# Supplementary material
Source: bioRxiv or medRxiv preprint supplement (https://medrxiv.org/highwire/filestream/85350/field_highwire_adjunct_files/0/2020.06.09.20126300-1.pdf)
Supplement: Supplementary file [file 2020.06.09.20126300-1.pdf]

## SUPPLEMENTARY INFORMATION

### sMETHODS

#### **Latent Growth Mixture (LGM) Modelling**

LGM models are characterised by the combination of latent growth curve modelling and latent class analysis. Such method allows to group individuals into trajectories according to their pattern of change over time. We estimated one LGM model with a specific intercept and slope growth factor for each trajectory. The within-group variation for each trajectory is represented by the intercept and slope growth factors which are modelled as continuous latent variables. The time metric was defined as *weeks into the study* (week 1- week 7). The optimal number of trajectories was identified using a stepwise approach. First, we fitted one LGM model with a single trajectory. Second, we included an additional trajectory at each following step until the optimal number of trajectories was reached. The optimal number of trajectories was determined using the following criteria: lower Akaike information criterion (AIC), lower sample-size adjusted Bayesian Information Criterion (ssaBIC), every class containing more than 5% of participants, entropy value (i.e. quality of the classification model) closest to 1.<sup>1</sup> The three-class solution was selected as the best fitting model since it had the best combination of lower AIC/ssaBIC and higher entropy and contained more than 5% of participants in each class (see sTable 2).

**sTable 1: Comparison of items in the original and revised Perceived Social Support Questionnaire (F-SozU K-6).**

| <b>Original</b>                                                                                          | <b>Adapted for COVID-19</b>                                                   |
|----------------------------------------------------------------------------------------------------------|-------------------------------------------------------------------------------|
|                                                                                                          | In the past week, I feel...                                                   |
| I experience a lot of understanding and security from others                                             | I have experienced a lot of understanding and support from others             |
| I know a very close person whose help I can always count on                                              | I have a very close person whose help I can always count on                   |
| If necessary, I can easily borrow something I might need from neighbours or friends                      | If necessary, I can easily borrow something I need from neighbours or friends |
| I know several people with whom I like to do things                                                      | I have people with whom I can spend time and do things together               |
| When I am sick, I can without hesitation ask friends and family to take care of important matters for me | If I get sick, I have friends and family who will take care of me             |
| If I am down, I know to whom I can go without hesitation                                                 | If I am feeling down, I have people I can talk to without hesitation          |

**sTable 2. LGM model fit indices**

|                         | <b>2 classes</b> | <b>3 classes</b>   | <b>4 classes</b> | <b>5 classes</b> |
|-------------------------|------------------|--------------------|------------------|------------------|
| <i>AIC</i>              | 1015405.783      | <b>1009196.561</b> | 1005160.275      | 1002587.930      |
| <i>ssaBIC</i>           | 1015542.660      | <b>1009379.064</b> | 1005388.404      | 1002861.685      |
| <i>N classes &gt;5%</i> | Yes              | <b>Yes</b>         | Yes              | No               |
| <i>Entropy</i>          | 0.813            | <b>0.811</b>       | 0.768            | 0.771            |

| <b>sTable 3. Weighted characteristics of the study participants at each wave.</b> |                               |                               |                               |                               |                               |                               |                            |
|-----------------------------------------------------------------------------------|-------------------------------|-------------------------------|-------------------------------|-------------------------------|-------------------------------|-------------------------------|----------------------------|
|                                                                                   | <b>Wave 1</b>                 | <b>Wave 2</b>                 | <b>Wave 3</b>                 | <b>Wave 4</b>                 | <b>Wave 5</b>                 | <b>Wave 6</b>                 | <b>Wave 7</b>              |
|                                                                                   | <b>Overall<br/>(N=51,417)</b> | <b>Overall<br/>(N=41,425)</b> | <b>Overall<br/>(N=34,314)</b> | <b>Overall<br/>(N=27,774)</b> | <b>Overall<br/>(N=18,009)</b> | <b>Overall<br/>(N=12,944)</b> | <b>Overall<br/>(N=406)</b> |
| <b>Sex</b>                                                                        |                               |                               |                               |                               |                               |                               |                            |
| Female                                                                            | 26276 (51.1%)                 | 21123 (51.0%)                 | 17463 (50.9%)                 | 14078 (50.7%)                 | 9278 (51.5%)                  | 6445 (49.8%)                  | 233 (57.4%)                |
| Male                                                                              | 25140 (48.9%)                 | 20302 (49.0%)                 | 16851 (49.1%)                 | 13696 (49.3%)                 | 8731 (48.5%)                  | 6499 (50.2%)                  | 173 (42.6%)                |
| <b>Age</b>                                                                        |                               |                               |                               |                               |                               |                               |                            |
| 18-29                                                                             | 9228 (17.9%)                  | 5918 (14.3%)                  | 3970 (11.6%)                  | 3024 (10.9%)                  | 1983 (11.0%)                  | 1186 (9.2%)                   | 92 (22.6%)                 |
| 30-44                                                                             | 11972 (23.3%)                 | 9287 (22.4%)                  | 7405 (21.6%)                  | 5664 (20.4%)                  | 3654 (20.3%)                  | 2439 (18.8%)                  | 130 (32.0%)                |
| 45-59                                                                             | 13723 (26.7%)                 | 11565 (27.9%)                 | 9861 (28.7%)                  | 7921 (28.5%)                  | 5085 (28.2%)                  | 3636 (28.1%)                  | 111 (27.2%)                |
| 60+                                                                               | 16494 (32.1%)                 | 14656 (35.4%)                 | 13078 (38.1%)                 | 11164 (40.2%)                 | 7287 (40.5%)                  | 5683 (43.9%)                  | 74 (18.1%)                 |
| <b>Ethnicity</b>                                                                  |                               |                               |                               |                               |                               |                               |                            |
| Non-white                                                                         | 6145 (12.0%)                  | 4176 (10.1%)                  | 3169 (9.2%)                   | 2490 (9.0%)                   | 1665 (9.2%)                   | 1080 (8.3%)                   | 60 (14.9%)                 |
| White                                                                             | 45272 (88.0%)                 | 37249 (89.9%)                 | 31145 (90.8%)                 | 25283 (91.0%)                 | 16344 (90.8%)                 | 11864 (91.7%)                 | 346 (85.1%)                |
| <b>Employment status</b>                                                          |                               |                               |                               |                               |                               |                               |                            |
| Employed                                                                          | 30888 (60.1%)                 | 24386 (58.9%)                 | 19811 (57.7%)                 | 15614 (56.2%)                 | 10085 (56.0%)                 | 6925 (53.5%)                  | 284 (69.9%)                |
| Inactive                                                                          | 19414 (37.8%)                 | 16329 (39.4%)                 | 13940 (40.6%)                 | 11700 (42.1%)                 | 7640 (42.4%)                  | 5826 (45.0%)                  | 114 (28.0%)                |
| Unemployed                                                                        | 1115 (2.2%)                   | 710 (1.7%)                    | 564 (1.6%)                    | 460 (1.7%)                    | 284 (1.6%)                    | 193 (1.5%)                    | 8 (2.1%)                   |
| <b>Education</b>                                                                  |                               |                               |                               |                               |                               |                               |                            |
| Postgraduate                                                                      | 17362 (33.8%)                 | 13733 (33.2%)                 | 11153 (32.5%)                 | 8958 (32.3%)                  | 5768 (32.0%)                  | 4174 (32.2%)                  | 75 (18.5%)                 |
| Undergraduate                                                                     | 16638 (32.4%)                 | 12958 (31.3%)                 | 10679 (31.1%)                 | 8620 (31.0%)                  | 5504 (30.6%)                  | 4151 (32.1%)                  | 59 (14.4%)                 |
| A-Level or Vocational                                                             | 6964 (13.5%)                  | 5984 (14.4%)                  | 5090 (14.8%)                  | 4169 (15.0%)                  | 2846 (15.8%)                  | 1896 (14.6%)                  | 159 (39.2%)                |
| GCSE or Lower                                                                     | 10453 (20.3%)                 | 8750 (21.1%)                  | 7392 (21.5%)                  | 6027 (21.7%)                  | 3890 (21.6%)                  | 2723 (21.0%)                  | 113 (27.9%)                |
| <b>Income</b>                                                                     |                               |                               |                               |                               |                               |                               |                            |
| N-Miss                                                                            | 5308                          | 4204                          | 3513                          | 2878                          | 1891                          | 1371                          | 36                         |
| <£16k                                                                             | 9704 (21.0%)                  | 7510 (20.2%)                  | 6035 (19.6%)                  | 4857 (19.5%)                  | 3152 (19.6%)                  | 2380 (20.6%)                  | 28 (7.6%)                  |
| £16k - £30k                                                                       | 12846 (27.9%)                 | 10270 (27.6%)                 | 8604 (27.9%)                  | 7005 (28.1%)                  | 4517 (28.0%)                  | 3372 (29.1%)                  | 76 (20.5%)                 |
| £30k - £60k                                                                       | 14434 (31.3%)                 | 11915 (32.0%)                 | 9956 (32.3%)                  | 8022 (32.2%)                  | 5131 (31.8%)                  | 3622 (31.3%)                  | 125 (33.8%)                |
| £60k - £90k                                                                       | 5488 (11.9%)                  | 4547 (12.2%)                  | 3777 (12.3%)                  | 3030 (12.2%)                  | 1996 (12.4%)                  | 1328 (11.5%)                  | 74 (19.9%)                 |
| >£90k                                                                             | 3638 (7.9%)                   | 2979 (8.0%)                   | 2428 (7.9%)                   | 1981 (8.0%)                   | 1322 (8.2%)                   | 871 (7.5%)                    | 68 (18.3%)                 |
| <b>Overcrowding</b>                                                               |                               |                               |                               |                               |                               |                               |                            |
| Not Overcrowded                                                                   | 47221 (91.8%)                 | 38979 (94.1%)                 | 32574 (94.9%)                 | 26489 (95.4%)                 | 17201 (95.5%)                 | 12471 (96.3%)                 | 382 (93.9%)                |
| Overcrowded                                                                       | 4196 (8.2%)                   | 2446 (5.9%)                   | 1740 (5.1%)                   | 1285 (4.6%)                   | 808 (4.5%)                    | 473 (3.7%)                    | 25 (6.1%)                  |
| <b>Tenure</b>                                                                     |                               |                               |                               |                               |                               |                               |                            |
| N-Miss                                                                            | 179                           | 139                           | 118                           | 103                           | 67                            | 50                            | 1                          |
| Own Mortgage                                                                      | 15991 (31.2%)                 | 13000 (31.5%)                 | 10617 (31.0%)                 | 8452 (30.5%)                  | 5375 (30.0%)                  | 3671 (28.5%)                  | 159 (39.1%)                |

|                                                     |               |               |               |               |               |               |             |
|-----------------------------------------------------|---------------|---------------|---------------|---------------|---------------|---------------|-------------|
| Own Outright                                        | 16016 (31.3%) | 14011 (33.9%) | 12500 (36.6%) | 10546 (38.1%) | 6886 (38.4%)  | 5311 (41.2%)  | 101 (25.0%) |
| Rent                                                | 19231 (37.5%) | 14275 (34.6%) | 11078 (32.4%) | 8672 (31.3%)  | 5681 (31.7%)  | 3912 (30.3%)  | 145 (35.8%) |
| <b>Socioeconomic disadvantage index - quartiles</b> |               |               |               |               |               |               |             |
| 1 (=lowest)                                         | 8353 (16.2%)  | 6994 (16.9%)  | 5867 (17.1%)  | 4691 (16.9%)  | 3079 (17.1%)  | 2020 (15.6%)  | 128 (31.6%) |
| 2                                                   | 9525 (18.5%)  | 7689 (18.6%)  | 6237 (18.2%)  | 4934 (17.8%)  | 3204 (17.8%)  | 2193 (16.9%)  | 119 (29.4%) |
| 3                                                   | 16395 (31.9%) | 13028 (31.4%) | 10685 (31.1%) | 8646 (31.1%)  | 5546 (30.8%)  | 3986 (30.8%)  | 87 (21.4%)  |
| 4 (=highest)                                        | 17143 (33.3%) | 13714 (33.1%) | 11525 (33.6%) | 9502 (34.2%)  | 6181 (34.3%)  | 4746 (36.7%)  | 71 (17.6%)  |
| <b>Key worker</b>                                   |               |               |               |               |               |               |             |
| Yes                                                 | 11342 (22.1%) | 8737 (21.1%)  | 6985 (20.4%)  | 5407 (19.5%)  | 3431 (19.1%)  | 2375 (18.3%)  | 75 (18.3%)  |
| <b>Chronic physical illness</b>                     |               |               |               |               |               |               |             |
| Yes                                                 | 19655 (38.2%) | 16565 (40.0%) | 14094 (41.1%) | 11518 (41.5%) | 7444 (41.3%)  | 5586 (43.2%)  | 122 (29.9%) |
| <b>Mental health disorder</b>                       |               |               |               |               |               |               |             |
| Yes                                                 | 10219 (19.9%) | 7873 (19.0%)  | 6160 (18.0%)  | 4858 (17.5%)  | 3084 (17.1%)  | 2158 (16.7%)  | 83 (20.5%)  |
| <b>Low social support</b>                           |               |               |               |               |               |               |             |
| Yes                                                 | 13235 (25.7%) | 10496 (25.3%) | 8618 (25.1%)  | 6920 (24.9%)  | 4356 (24.2%)  | 3230 (25.0%)  | 103 (25.5%) |
| <b>Psychological/physical abuse</b>                 |               |               |               |               |               |               |             |
| Yes                                                 | 5798 (11.3%)  | 4579 (11.1%)  | 3802 (11.1%)  | 3058 (11.0%)  | 2008 (11.1%)  | 1386 (10.7%)  | 57 (14.0%)  |
| <b>COVID-19 symptoms</b>                            |               |               |               |               |               |               |             |
| Yes                                                 | 7618 (14.8%)  | 6237 (15.1%)  | 5048 (14.7%)  | 3984 (14.3%)  | 2543 (14.1%)  | 1794 (13.9%)  | 78 (19.1%)  |
| <b>Depressive symptoms (categories)</b>             |               |               |               |               |               |               |             |
| N-Miss                                              | 0             | 30            | 19            | 36            | 26            | 40            | 3           |
| minimal/mild                                        | 35715 (69.5%) | 30078 (72.7%) | 26084 (76.1%) | 21330 (76.9%) | 14173 (78.8%) | 10019 (77.6%) | 284 (70.6%) |
| moderate                                            | 12451 (24.2%) | 9452 (22.8%)  | 6845 (20.0%)  | 5301 (19.1%)  | 3152 (17.5%)  | 2350 (18.2%)  | 86 (21.4%)  |
| severe                                              | 3251 (6.3%)   | 1864 (4.5%)   | 1366 (4.0%)   | 1107 (4.0%)   | 657 (3.7%)    | 535 (4.1%)    | 32 (8.0%)   |

| <b>sTable 4. Unweighted characteristics of the study participants at each wave.</b> |                               |                               |                               |                               |                               |                               |                            |
|-------------------------------------------------------------------------------------|-------------------------------|-------------------------------|-------------------------------|-------------------------------|-------------------------------|-------------------------------|----------------------------|
|                                                                                     | <b>Wave 1</b>                 | <b>Wave 2</b>                 | <b>Wave 3</b>                 | <b>Wave 4</b>                 | <b>Wave 5</b>                 | <b>Wave 6</b>                 | <b>Wave 7</b>              |
|                                                                                     | <b>Overall<br/>(N=53,170)</b> | <b>Overall<br/>(N=45,028)</b> | <b>Overall<br/>(N=37,820)</b> | <b>Overall<br/>(N=30,273)</b> | <b>Overall<br/>(N=19,548)</b> | <b>Overall<br/>(N=13,668)</b> | <b>Overall<br/>(N=627)</b> |
| <b>Sex</b>                                                                          |                               |                               |                               |                               |                               |                               |                            |
| Female                                                                              | 39652 (74.6%)                 | 33478 (74.3%)                 | 28122 (74.4%)                 | 22568 (74.5%)                 | 14774 (75.6%)                 | 10202 (74.6%)                 | 505 (80.5%)                |
| Male                                                                                | 13518 (25.4%)                 | 11550 (25.7%)                 | 9698 (25.6%)                  | 7705 (25.5%)                  | 4774 (24.4%)                  | 3466 (25.4%)                  | 122 (19.5%)                |
| <b>Age</b>                                                                          |                               |                               |                               |                               |                               |                               |                            |
| 18-29                                                                               | 5126 (9.6%)                   | 3757 (8.3%)                   | 2718 (7.2%)                   | 2095 (6.9%)                   | 1392 (7.1%)                   | 836 (6.1%)                    | 64 (10.2%)                 |
| 30-44                                                                               | 14927 (28.1%)                 | 12287 (27.3%)                 | 10045 (26.6%)                 | 7763 (25.6%)                  | 5075 (26.0%)                  | 3319 (24.3%)                  | 222 (35.4%)                |
| 45-59                                                                               | 17497 (32.9%)                 | 14999 (33.3%)                 | 12848 (34.0%)                 | 10330 (34.1%)                 | 6674 (34.1%)                  | 4653 (34.0%)                  | 222 (35.4%)                |
| 60+                                                                                 | 15620 (29.4%)                 | 13985 (31.1%)                 | 12209 (32.3%)                 | 10085 (33.3%)                 | 6407 (32.8%)                  | 4860 (35.6%)                  | 119 (19.0%)                |
| <b>Ethnicity</b>                                                                    |                               |                               |                               |                               |                               |                               |                            |
| Non-white                                                                           | 2690 (5.1%)                   | 2036 (4.5%)                   | 1604 (4.2%)                   | 1263 (4.2%)                   | 845 (4.3%)                    | 538 (3.9%)                    | 35 (5.6%)                  |
| White                                                                               | 50480 (94.9%)                 | 42992 (95.5%)                 | 36216 (95.8%)                 | 29010 (95.8%)                 | 18703 (95.7%)                 | 13130 (96.1%)                 | 592 (94.4%)                |
| <b>Employment status</b>                                                            |                               |                               |                               |                               |                               |                               |                            |
| Employed                                                                            | 35207 (66.2%)                 | 29458 (65.4%)                 | 24561 (64.9%)                 | 19471 (64.3%)                 | 12682 (64.9%)                 | 8541 (62.5%)                  | 479 (76.4%)                |
| Inactive                                                                            | 17226 (32.4%)                 | 15007 (33.3%)                 | 12795 (33.8%)                 | 10439 (34.5%)                 | 6634 (33.9%)                  | 4970 (36.4%)                  | 144 (23.0%)                |
| Unemployed                                                                          | 737 (1.4%)                    | 563 (1.3%)                    | 464 (1.2%)                    | 363 (1.2%)                    | 232 (1.2%)                    | 157 (1.1%)                    | 4 (0.6%)                   |
| <b>Education</b>                                                                    |                               |                               |                               |                               |                               |                               |                            |
| Postgraduate                                                                        | 9641 (18.1%)                  | 7992 (17.7%)                  | 6568 (17.4%)                  | 5215 (17.2%)                  | 3303 (16.9%)                  | 2377 (17.4%)                  | 37 (5.9%)                  |
| Undergraduate                                                                       | 7706 (14.5%)                  | 6186 (13.7%)                  | 5086 (13.4%)                  | 4014 (13.3%)                  | 2506 (12.8%)                  | 1859 (13.6%)                  | 23 (3.7%)                  |
| A-Level or Vocational                                                               | 14336 (27.0%)                 | 12447 (27.6%)                 | 10647 (28.2%)                 | 8654 (28.6%)                  | 5856 (30.0%)                  | 3931 (28.8%)                  | 327 (52.2%)                |
| GCSE or Lower                                                                       | 21487 (40.4%)                 | 18403 (40.9%)                 | 15519 (41.0%)                 | 12390 (40.9%)                 | 7883 (40.3%)                  | 5501 (40.2%)                  | 240 (38.3%)                |
| <b>Income</b>                                                                       |                               |                               |                               |                               |                               |                               |                            |
| N-Miss                                                                              | 4812                          | 4071                          | 3457                          | 2792                          | 1816                          | 1305                          | 36                         |
| <£16k                                                                               | 7279 (15.1%)                  | 5943 (14.5%)                  | 4895 (14.2%)                  | 3897 (14.2%)                  | 2433 (13.7%)                  | 1808 (14.6%)                  | 38 (6.4%)                  |
| £16k - £30k                                                                         | 11570 (23.9%)                 | 9752 (23.8%)                  | 8139 (23.7%)                  | 6493 (23.6%)                  | 4176 (23.6%)                  | 3007 (24.3%)                  | 100 (16.9%)                |
| £30k - £60k                                                                         | 16718 (34.6%)                 | 14290 (34.9%)                 | 12024 (35.0%)                 | 9615 (35.0%)                  | 6185 (34.9%)                  | 4273 (34.6%)                  | 216 (36.5%)                |
| £60k - £90k                                                                         | 7530 (15.6%)                  | 6463 (15.8%)                  | 5466 (15.9%)                  | 4352 (15.8%)                  | 2855 (16.1%)                  | 1917 (15.5%)                  | 128 (21.7%)                |
| >£90k                                                                               | 5261 (10.9%)                  | 4509 (11.0%)                  | 3839 (11.2%)                  | 3124 (11.4%)                  | 2083 (11.7%)                  | 1358 (11.0%)                  | 109 (18.4%)                |
| <b>Overcrowding</b>                                                                 |                               |                               |                               |                               |                               |                               |                            |
| Not Overcrowded                                                                     | 50457 (94.9%)                 | 43121 (95.8%)                 | 36375 (96.2%)                 | 29175 (96.4%)                 | 18842 (96.4%)                 | 13260 (97.0%)                 | 612 (97.6%)                |
| Overcrowded                                                                         | 2713 (5.1%)                   | 1907 (4.2%)                   | 1445 (3.8%)                   | 1098 (3.6%)                   | 706 (3.6%)                    | 408 (3.0%)                    | 15 (2.4%)                  |
| <b>Tenure</b>                                                                       |                               |                               |                               |                               |                               |                               |                            |
| N-Miss                                                                              | 184                           | 143                           | 123                           | 106                           | 68                            | 48                            | 2                          |
| Own Mortgage                                                                        | 19826 (37.4%)                 | 16782 (37.4%)                 | 14056 (37.3%)                 | 11131 (36.9%)                 | 7213 (37.0%)                  | 4867 (35.7%)                  | 277 (44.3%)                |

|                                                     |               |               |               |               |               |               |             |
|-----------------------------------------------------|---------------|---------------|---------------|---------------|---------------|---------------|-------------|
| Own Outright                                        | 18017 (34.0%) | 15963 (35.6%) | 13918 (36.9%) | 11403 (37.8%) | 7291 (37.4%)  | 5412 (39.7%)  | 188 (30.1%) |
| Rent                                                | 15143 (28.6%) | 12140 (27.0%) | 9723 (25.8%)  | 7633 (25.3%)  | 4976 (25.5%)  | 3341 (24.5%)  | 160 (25.6%) |
| <b>Socioeconomic disadvantage index - quartiles</b> |               |               |               |               |               |               |             |
| 1 (=lowest)                                         | 15151 (28.5%) | 12962 (28.8%) | 10978 (29.0%) | 8705 (28.8%)  | 5756 (29.4%)  | 3789 (27.7%)  | 272 (43.4%) |
| 2                                                   | 11283 (21.2%) | 9529 (21.2%)  | 7989 (21.1%)  | 6432 (21.2%)  | 4189 (21.4%)  | 2838 (20.8%)  | 160 (25.5%) |
| 3                                                   | 13701 (25.8%) | 11566 (25.7%) | 9607 (25.4%)  | 7713 (25.5%)  | 4929 (25.2%)  | 3509 (25.7%)  | 119 (19.0%) |
| 4 (=highest)                                        | 13035 (24.5%) | 10971 (24.4%) | 9246 (24.4%)  | 7423 (24.5%)  | 4674 (23.9%)  | 3532 (25.8%)  | 76 (12.1%)  |
| <b>Key worker</b>                                   |               |               |               |               |               |               |             |
| Yes                                                 | 12817 (24.1%) | 10502 (23.3%) | 8602 (22.7%)  | 6660 (22.0%)  | 4305 (22.0%)  | 2875 (21.0%)  | 160 (25.5%) |
| <b>Chronic physical illness</b>                     |               |               |               |               |               |               |             |
| Yes                                                 | 19358 (36.4%) | 16715 (37.1%) | 14175 (37.5%) | 11420 (37.7%) | 7310 (37.4%)  | 5304 (38.8%)  | 183 (29.2%) |
| <b>Mental health disorder</b>                       |               |               |               |               |               |               |             |
| Yes                                                 | 10174 (19.1%) | 8320 (18.5%)  | 6759 (17.9%)  | 5256 (17.4%)  | 3317 (17.0%)  | 2289 (16.7%)  | 122 (19.5%) |
| <b>Low social support</b>                           |               |               |               |               |               |               |             |
| Yes                                                 | 11593 (21.8%) | 9740 (21.6%)  | 8174 (21.6%)  | 6520 (21.5%)  | 4112 (21.0%)  | 2984 (21.8%)  | 143 (22.8%) |
| <b>Psychological/physical abuse</b>                 |               |               |               |               |               |               |             |
| Yes                                                 | 5422 (10.2%)  | 4689 (10.4%)  | 4052 (10.7%)  | 3281 (10.8%)  | 2134 (10.9%)  | 1424 (10.4%)  | 69 (11.0%)  |
| <b>COVID-19 symptoms</b>                            |               |               |               |               |               |               |             |
| Yes                                                 | 8295 (15.6%)  | 7084 (15.7%)  | 5917 (15.6%)  | 4710 (15.6%)  | 3023 (15.5%)  | 2062 (15.1%)  | 122 (19.5%) |
| <b>Depressive symptoms (categories)</b>             |               |               |               |               |               |               |             |
| N-Miss                                              | 0             | 31            | 32            | 43            | 26            | 43            | 3           |
| minimal/mild                                        | 38588 (72.6%) | 33642 (74.8%) | 29179 (77.2%) | 23505 (77.8%) | 15503 (79.4%) | 10681 (78.4%) | 455 (72.9%) |
| moderate                                            | 12109 (22.8%) | 9770 (21.7%)  | 7407 (19.6%)  | 5761 (19.1%)  | 3441 (17.6%)  | 2486 (18.2%)  | 139 (22.3%) |
| severe                                              | 2473 (4.7%)   | 1585 (3.5%)   | 1202 (3.2%)   | 964 (3.2%)    | 578 (3.0%)    | 458 (3.4%)    | 30 (4.8%)   |

**sTable 5. Associations of sociodemographic, psychosocial, and health-related vulnerabilities with group-based trajectories of depressive symptoms.**

|                                            | Moderate Depressive Symptom Trajectory |       |         |                      |                      | Severe Depressive Symptom Trajectory |       |         |                      |                      |
|--------------------------------------------|----------------------------------------|-------|---------|----------------------|----------------------|--------------------------------------|-------|---------|----------------------|----------------------|
|                                            | OR                                     | SE    | p-value | 95% CI - Lower bound | 95% CI - Upper bound | OR                                   | SE    | p-value | 95% CI - Lower bound | 95% CI - Upper bound |
| <i>Model 1 (individual effects)</i>        |                                        |       |         |                      |                      |                                      |       |         |                      |                      |
| <b>Covariates</b>                          |                                        |       |         |                      |                      |                                      |       |         |                      |                      |
| Sex:Female                                 | 1.74                                   | 0.044 | <0.001  | 1.66                 | 1.83                 | 1.64                                 | 0.061 | <0.001  | 1.52                 | 1.76                 |
| Age:30-44                                  | 0.57                                   | 0.071 | <0.001  | 0.43                 | 0.71                 | 0.40                                 | 0.079 | <0.001  | 0.25                 | 0.56                 |
| Age:45-59                                  | 0.38                                   | 0.072 | <0.001  | 0.24                 | 0.52                 | 0.29                                 | 0.078 | <0.001  | 0.14                 | 0.44                 |
| Age:60+<br>(ref: 18-29)                    | 0.17                                   | 0.080 | <0.001  | 0.02                 | 0.33                 | 0.09                                 | 0.098 | <0.001  | -0.10                | 0.28                 |
| COVID-19 symptoms                          | 1.90                                   | 0.055 | <0.001  | 1.79                 | 2.01                 | 2.30                                 | 0.072 | <0.001  | 2.16                 | 2.45                 |
| <b>Sociodemographic vulnerabilities</b>    |                                        |       |         |                      |                      |                                      |       |         |                      |                      |
| Low SEP                                    | 1.97                                   | 0.054 | <0.001  | 1.87                 | 2.08                 | 5.22                                 | 0.072 | <0.001  | 5.08                 | 5.36                 |
| Ethnicity: Non-white                       | 1.21                                   | 0.093 | 0.038   | 1.03                 | 1.40                 | 1.07                                 | 0.109 | 0.562   | 0.85                 | 1.28                 |
| Key worker                                 | 0.97                                   | 0.050 | 0.545   | 0.87                 | 1.07                 | 0.66                                 | 0.070 | <0.001  | 0.53                 | 0.80                 |
| <b>Health-related vulnerabilities</b>      |                                        |       |         |                      |                      |                                      |       |         |                      |                      |
| Physical illness                           | 1.89                                   | 0.046 | <0.001  | 1.79                 | 1.98                 | 3.41                                 | 0.064 | <0.001  | 3.29                 | 3.54                 |
| Mental illness                             | 4.24                                   | 0.001 | <0.001  | 4.24                 | 4.24                 | 12.99                                | 0.058 | <0.001  | 12.87                | 13.10                |
| <b>Psychosocial vulnerabilities</b>        |                                        |       |         |                      |                      |                                      |       |         |                      |                      |
| Abuse                                      | 5.34                                   | 0.100 | <0.001  | 5.15                 | 5.54                 | 13.16                                | 0.108 | <0.001  | 12.95                | 13.37                |
| Low social support                         | 4.71                                   | 0.056 | <0.001  | 4.60                 | 4.82                 | 12.72                                | 0.073 | <0.001  | 12.57                | 12.86                |
| <i>Model 2 (mutually adjusted effects)</i> |                                        |       |         |                      |                      |                                      |       |         |                      |                      |
| <b>Covariates</b>                          |                                        |       |         |                      |                      |                                      |       |         |                      |                      |
| Sex:Female                                 | 2.11                                   | 0.051 | <0.001  | 2.01                 | 2.21                 | 2.05                                 | 0.080 | <0.001  | 1.90                 | 2.21                 |
| Age:30-44                                  | 0.43                                   | 0.081 | <0.001  | 0.28                 | 0.59                 | 0.23                                 | 0.108 | <0.001  | 0.02                 | 0.44                 |
| Age:45-59                                  | 0.22                                   | 0.082 | <0.001  | 0.06                 | 0.38                 | 0.10                                 | 0.112 | <0.001  | -0.12                | 0.32                 |
| Age:60+<br>(ref: 18-29)                    | 0.09                                   | 0.097 | <0.001  | -0.10                | 0.28                 | 0.02                                 | 0.143 | <0.001  | -0.26                | 0.30                 |
| COVID-19 symptoms                          | 1.92                                   | 0.064 | <0.001  | 1.80                 | 2.05                 | 2.25                                 | 0.090 | <0.001  | 2.08                 | 2.43                 |
| <b>Sociodemographic vulnerabilities</b>    |                                        |       |         |                      |                      |                                      |       |         |                      |                      |
| Low SEP                                    | 1.37                                   | 0.061 | <0.001  | 1.25                 | 1.49                 | 2.58                                 | 0.084 | <0.001  | 2.41                 | 2.74                 |
| Ethnicity: Non-white                       | 1.17                                   | 0.111 | 0.161   | 0.95                 | 1.39                 | 1.02                                 | 0.147 | 0.870   | 0.74                 | 1.31                 |
| Key worker                                 | 1.06                                   | 0.056 | 0.315   | 0.95                 | 1.17                 | 0.92                                 | 0.089 | 0.351   | 0.75                 | 1.09                 |

| <b>Health-related vulnerabilities</b>                                                                                                                                                                                                                         |      |       |        |      |      |       |       |        |       |       |
|---------------------------------------------------------------------------------------------------------------------------------------------------------------------------------------------------------------------------------------------------------------|------|-------|--------|------|------|-------|-------|--------|-------|-------|
| Physical illness                                                                                                                                                                                                                                              | 1.74 | 0.050 | <0.001 | 1.65 | 1.84 | 2.41  | 0.076 | <0.001 | 2.26  | 2.56  |
| Mental illness                                                                                                                                                                                                                                                | 7.64 | 0.073 | <0.001 | 7.49 | 7.78 | 30.39 | 0.090 | <0.001 | 30.21 | 30.56 |
| <b>Psychosocial vulnerabilities</b>                                                                                                                                                                                                                           |      |       |        |      |      |       |       |        |       |       |
| Abuse                                                                                                                                                                                                                                                         | 6.00 | 0.095 | <0.001 | 5.82 | 6.19 | 13.71 | 0.110 | <0.001 | 13.49 | 13.92 |
| Low social support                                                                                                                                                                                                                                            | 4.16 | 0.060 | <0.001 | 4.04 | 4.28 | 9.74  | 0.087 | <0.001 | 9.57  | 9.91  |
| <p><b>Note.</b> The odds ratios represent the risk of belonging to the Moderate or Severe depressive symptom trajectory compared with the Low trajectory. All models were adjusted for sex, age, and COVID-19 symptoms and weighted using survey weights.</p> |      |       |        |      |      |       |       |        |       |       |



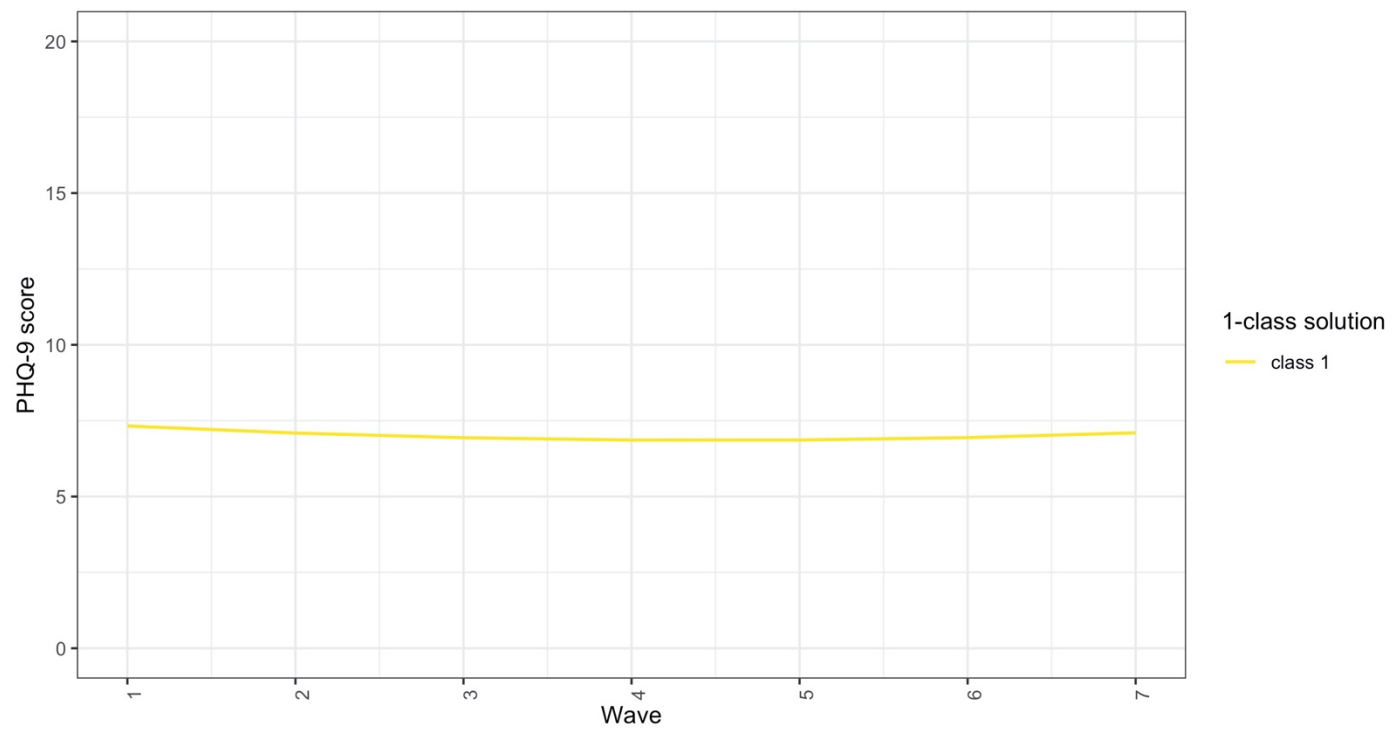

**Figure 1. Average levels of depressive symptoms throughout the study (wave 1-7).**
